# Supplementary material for: Determining monolignol oxifunctionalization by direct infusion electrospray ionization tandem mass spectrometry
Source: Royal Society of Chemistry journal article supplement (doi:10.1039/d4ay00403e), 2024-01-01
Supplement: d4ay00403e1.pdf [file d4ay00403e1.pdf]

1 Supplementary Information for  
2 **Determining Monolignol Oxifunctionalization by Direct Infusion**  
3 **Electrospray Ionization Tandem Mass Spectrometry**

4  
5 Rannei Skaali,<sup>\*a</sup> Hanne Devle,<sup>a</sup> Katharina Ebner,<sup>b</sup> Dag Ekeberg,<sup>a</sup> and Morten Sørli<sup>a</sup>

6 <sup>a</sup>Faculty of Chemistry, Biotechnology and Food Science, Norwegian University of Life Sciences, Christian Magnus  
7 Falsens vei 18, 1433, Ås, Norway.

8 <sup>b</sup>Bisy GmbH, Wünschendorf 292, 8200 Hofstätten an der Raab, Austria

9 \* Correspondence to: rannei.skaali@nmbu.no

10 **This Supplementary Includes:**

- |                                             |       |
|---------------------------------------------|-------|
| 1. List of Supplementary Figures and Tables | pg. 1 |
| 2. Preliminary Enzyme Selection             | pg. 2 |
| 3. Supplementary Tables (1-2)               | pg. 3 |
| 4. Supplementary Figures (1-4)              | pg. 5 |
| 5. Supplementary References                 | pg. 9 |

11 **1. List of Supplementary Figures and Tables**

12 **Fig. S1:** Isotope labeling experiment.

13 **Fig. S2:** Ion suppression.

14 **Fig. S3:** MS/MS analysis of 4-propylguaiacol and 4-propylsyringol with respective oxifunctionalized products.

15 **Fig. S4:** MS/MS analysis of UPO-based oxifunctionalized monolignols.

16 **Fig. S5:** Full scan DI-ESI-MS of *Cma*UPO-I catalyzed biotransformation of 4PS at 37°C.

17 **Table S1:** Activity of commercial UPO library on the substrates 5-nitro-1,3-benzodioxol (NBD) and 4-nitroanisol (4-  
18 NA).

19 **Table S2:** Monolignol calibration curves.

20

## 21 2. Preliminary Enzyme Selection

22 Preliminary enzyme selection was performed using 41 different proteins of the class UPO produced by bisy GmbH  
23 (Wuenschendorf, Hofstaetten a. d. Raab, AUT). Briefly, the activity of the enzymes on two different substrates, 5-nitro-1,3-  
24 benzodioxol (NBD) and 4-nitroanisol (4-NA), was determined in a microplate-based high-throughput (HT) approach using  
25 spectrophotometric assays. Both substrates represent small aromatic molecules reminiscent of guaiacol units of lignin-  
26 containing methyl groups liable for elimination via demethylation, which is a desirable reaction for the degradation as well as  
27 functionalization of lignin.<sup>1</sup> O-dealkylation of NBD to 4-nitrocatechol is a well-established reaction for determining the  
28 peroxygenase activity of UPOs and the corresponding HT assay is routinely used for enzyme engineering approaches.<sup>2-4</sup>  
29 However, the methylene group in NBD is bound in an acetal moiety, which makes it highly activated (electron-rich) and  
30 therefore favored for demethylation. In contrast, the conversion of 4-NA to 4-nitrophenol represents the elimination of a non-  
31 activated methyl group via demethylation. The activity of *Aae*UPO on this substrate has previously been shown with analysis  
32 of product formation using HPLC.<sup>5</sup> Alternatively, we used an HT microplate-based approach for detecting the production of 4-  
33 Nitrophenol at 400 nm in a spectrophotometer.

34  
35 For both substrates enzymatic activity was determined in kinetic measurements following product formation at 425 nm and  
36 400 nm for NBD and 4-NA, respectively. For NBD and 4-NA assay specific enzyme activity was calculated using the volumetric  
37 activity (U/mL) determined with the extinction coefficient of the reaction product as described in literature (NBD:  $\epsilon(425) =$   
38  $9700 \text{ 1/M}\cdot\text{cm}^2$ ) or the change in absorbance over time ( $\Delta\text{Abs}_{425}/\text{min}$ ), respectively, normalized to protein amount determined  
39 by standard Bradford assay (Table S1). For the conversion of NBD to 4-nitrocatechol, the reaction conditions were as follows:  
40 100 mM potassium phosphate buffer pH 7.0, 123  $\mu\text{M}$  NBD, 1 vol% ACN, and 1 mM  $\text{H}_2\text{O}_2$  at room temperature (RT). For the  
41 conversion of 4-NA to 4-nitrophenol, the reaction conditions were as follows: 100 mM Trizin buffer pH 7.5, 0.7 mM 4-NA, 5  
42 vol% ACN, and 0.35 mM  $\text{H}_2\text{O}_2$  at RT. Reactions were done in a total volume of 200  $\mu\text{L}$  in 96-well microtiter plates (polystyrol,  
43 transparent, F-bottom) using 20  $\mu\text{L}$  or 60  $\mu\text{L}$  protein suspensions (in an appropriate dilution) for NBD and 4-NA, respectively.  
44 Plates were stirred briefly, and the initial absorptions were recorded using a plate reader (SpectraMax ABS Plus, Molecular  
45 Devices, Sunnyvale, CA, USA) for 5 minutes and the initial linear range of the curve plotting the absorbance against time was  
46 used for the calculation of enzymatic activity.

47  
48 Based on the activity on both substrates one enzyme of each family was selected for further work (Table 1, bold), whereby  
49 the activity of the enzyme *Aae*UPO (model UPO from *Agroclybe aegerita*) (Table S1, grey) was evaluated as control. For the  
50 “long” class family *Cma*UPO-I was chosen, which shows the highest activity on both substrates for all tested “long” UPOs. For  
51 the “short” class family an enzyme showing only average activity on the substrates was selected, *Hsp*UPO. However, for this  
52 UPO a crystal structure as well as a rather broad spectrum of substrates was recently published.<sup>6, 7</sup>

53

### 54 3. Supplementary Tables

55 **Table S1: Activity of 41 different UPOs on the substrates 5-nitro-1,3-benzodioxol (NBD) and 4-nitroanisole (4-NA).** Systematic name of the enzymes, the  
 56 corresponding NCBI accession number, as well as the family classification of “long” or “short” UPO are given. UPOs used for further work are highlighted in bold.  
 57 Activities of the model UPO from *Agrocybe aegerita* (*AaeUPO*) were evaluated as a control and are given in grey.

| UPO Systematic Name                  | NCBI accession number | Family   | NBD conversion<br>[U*mg <sup>-1</sup> Protein <sup>-1</sup> ]                      |                                                                                     | 4-NA conversion<br>[ΔAbs <sub>425</sub> *mL*min <sup>-1</sup> *mg <sup>-1</sup> ] |  |
|--------------------------------------|-----------------------|----------|------------------------------------------------------------------------------------|-------------------------------------------------------------------------------------|-----------------------------------------------------------------------------------|--|
|                                      |                       |          | 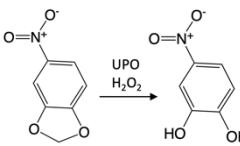 |  |                                                                                   |  |
| <i>GmaUPO-II</i> <sup>14</sup>       | KDR72024.1            | L        | 60.08                                                                              | 63.20                                                                               |                                                                                   |  |
| <i>LamUPO</i> <sup>7</sup>           | KIK06072.1            | L        | 50.48                                                                              | 31.56                                                                               |                                                                                   |  |
| <i>HcyUPO</i> <sup>7</sup>           | KIM43689.1            | L        | n.d.                                                                               | 6.29                                                                                |                                                                                   |  |
| <i>AbrUPO-II</i> <sup>15</sup>       | OJJ73116.1            | S        | 1849.28                                                                            | 5270.06                                                                             |                                                                                   |  |
| <b><i>HspUPO</i><sup>12,16</sup></b> | <b>701R_A</b>         | <b>S</b> | <b>77.44</b>                                                                       | <b>1849.80</b>                                                                      |                                                                                   |  |
| <i>PanUPO</i> <sup>7</sup>           | XP_001911526.1        | S        | 130.28                                                                             | 0.67                                                                                |                                                                                   |  |
| <i>DspUPO-I</i> <sup>7</sup>         | OTB17553.1            | S        | 4288.02                                                                            | 2403.11                                                                             |                                                                                   |  |
| <i>AtuUPO</i> <sup>7</sup>           | XP_035359174.1        | S        | 93.51                                                                              | 2451.53                                                                             |                                                                                   |  |
| <i>AniUPO-II</i> <sup>7</sup>        | XP_001390900.2        | S        | 495.02                                                                             | 2036.39                                                                             |                                                                                   |  |
| <i>AluUPO</i> <sup>7</sup>           | XP_041545399.1        | S        | 1789.86                                                                            | 790.70                                                                              |                                                                                   |  |
| <i>HspUPO-II</i> <sup>7</sup>        | OTB02684.1            | S        | n.d.                                                                               | 90.26                                                                               |                                                                                   |  |
| <i>RneUPO</i> <sup>7</sup>           | GAP92448.1            | S        | 453.12                                                                             | 55.44                                                                               |                                                                                   |  |
| <i>DspUPO-II</i> <sup>7</sup>        | OTB09996.1            | S        | 1416.77                                                                            | 2438.99                                                                             |                                                                                   |  |
| <i>AacUPO</i> <sup>7</sup>           | XP_020060613.1        | S        | 257.02                                                                             | 477.05                                                                              |                                                                                   |  |
| <i>GmaUPO-I</i> <sup>16,17</sup>     | KDR77412.1            | L        | 21.63                                                                              | 19.71                                                                               |                                                                                   |  |
| <i>CabUPO-III</i> <sup>16</sup>      | RXW15716.1            | L        | 1018.97                                                                            | 347.20                                                                              |                                                                                   |  |
| <b><i>CmaUPO-I</i><sup>16</sup></b>  | <b>TFK24496.1</b>     | <b>L</b> | <b>1105.40</b>                                                                     | <b>603.65</b>                                                                       |                                                                                   |  |
| <i>CmaUPO-II</i> <sup>16</sup>       | TFK18510.1            | L        | 170.47                                                                             | 0.68                                                                                |                                                                                   |  |
| <i>LspUPO-II</i> <sup>16</sup>       | KXN91485.1            | L        | 2266.69                                                                            | 13.48                                                                               |                                                                                   |  |
| <i>GdiUPO-II</i> <sup>15</sup>       | PPR06026.1            | L        | n.d.                                                                               | 0.17                                                                                |                                                                                   |  |
| <i>GdiUPO</i> <sup>16</sup>          | PPQ67339.1            | L        | 25.50                                                                              | 1.83                                                                                |                                                                                   |  |
| <i>CmiUPO</i> <sup>16</sup>          | TEB20562.1            | L        | 45.73                                                                              | 1.23                                                                                |                                                                                   |  |
| <i>AnoUPO</i> <sup>16</sup>          | KAB8223135.1          | S        | 88.37                                                                              | 1.16                                                                                |                                                                                   |  |
| <i>GluUPO</i> <sup>16</sup>          | KIK53163.1            | S        | 90.40                                                                              | 96.40                                                                               |                                                                                   |  |
| <i>DbiUPO</i> <sup>16</sup>          | THV03356.1            | S        | 232.54                                                                             | 2268.10                                                                             |                                                                                   |  |
| <i>AbrUPO-I</i> <sup>16</sup>        | OJJ67899.1            | S        | 389.74                                                                             | 3372.91                                                                             |                                                                                   |  |
| <i>ApsUPO</i> <sup>16</sup>          | XP_031917627.1        | S        | 24.46                                                                              | 0.84                                                                                |                                                                                   |  |
| <i>AboUPO</i> <sup>16</sup>          | XP_022384340.1        | S        | 21.80                                                                              | 0.75                                                                                |                                                                                   |  |
| <i>SchUPO</i> <sup>16</sup>          | KFA56383.1            | S        | n.d.                                                                               | 20.43                                                                               |                                                                                   |  |
| <i>CabUPO-IV</i> <sup>15</sup>       | RXW17550.1            | L        | 640.13                                                                             | n.d.                                                                                |                                                                                   |  |
| <i>MfuUPO</i> <sup>7</sup>           | KAF9443253.1          | L        | 1005.68                                                                            | n.d.                                                                                |                                                                                   |  |
| <i>SstUPO-II</i> <sup>7</sup>        | KIJ30606.1            | L        | 48.40                                                                              | n.d.                                                                                |                                                                                   |  |
| <i>ElaUPO</i> <sup>7</sup>           | EMR65404.1            | S        | n.d.                                                                               | 9.17                                                                                |                                                                                   |  |
| <i>MspUPO</i> <sup>7</sup>           | RYP65438.1            | S        | n.d.                                                                               | 45.54                                                                               |                                                                                   |  |
| <i>PspUPO</i> <sup>7</sup>           | KFY04896.1            | S        | n.d.                                                                               | n.d.                                                                                |                                                                                   |  |
| <i>SniUPO</i> <sup>7</sup>           | KZS95554.1            | L        | 41.55                                                                              | 0.78                                                                                |                                                                                   |  |
| <i>SsuUPO</i> <sup>7</sup>           | KZT37902.1            | S        | 110.75                                                                             | n.d.                                                                                |                                                                                   |  |
| <i>CabUPO-V</i> <sup>7</sup>         | RXW17616.1            | L        | 43.37                                                                              | n.d.                                                                                |                                                                                   |  |
| <i>CabUPO-VII</i> <sup>7</sup>       | RXW15623.1            | L        | 19.68                                                                              | n.d.                                                                                |                                                                                   |  |
| <i>MveUPO</i> <sup>7</sup>           | KAF7328405.1          | L        | 57.85                                                                              | n.d.                                                                                |                                                                                   |  |
| <i>MarUPO</i> <sup>7</sup>           | KAG7088824.1          | S        | 220.36                                                                             | 1610.94                                                                             |                                                                                   |  |
| <i>AaeUPO</i> <sup>1</sup>           | B9W4V6.1              | L        | 10791.95                                                                           | 3950.41                                                                             |                                                                                   |  |

58

59  
60

**Table S2: Monolignol calibration curves.** We employed linear regression ( $y = ax + b$ ) to construct monolignol calibration curves, assuming a linear relationship between monolignol concentration (explanatory variable) and intensity (response variable). The  $R^2$  (%) is provided for each calibration curve.

| Monolignol                                             | $\alpha$           | $\beta$             | $R^2$ (%) |
|--------------------------------------------------------|--------------------|---------------------|-----------|
| 4-propylphenol                                         | $4.99 \times 10^4$ | $4.19 \times 10^5$  | 99.59     |
| 4-hydroxybenzoic acid                                  | $4.39 \times 10^4$ | $2.61 \times 10^5$  | 99.57     |
| 4-(3-hydroxypropyl)phenol <sup>a</sup>                 | $7.74 \times 10^3$ | $1.20 \times 10^5$  | 97.15     |
| 4-propylbenzene-1,2-diol <sup>a</sup>                  | $1.81 \times 10^2$ | $-1.58 \times 10^3$ | 99.69     |
| 4-propylbenzene-1,3-diol <sup>a</sup>                  | $1.74 \times 10^2$ | $1.05 \times 10^3$  | 99.66     |
| 4-(1-hydroxypropyl)phenol <sup>a</sup>                 | $7.73 \times 10^0$ | $-6.44 \times 10^1$ | 96.06     |
| 4-(2-hydroxypropyl)phenol <sup>a</sup>                 | $6.21 \times 10^1$ | $1.29 \times 10^3$  | 99.05     |
| 3-(4-hydroxyphenyl)propanal <sup>b</sup>               | $7.63 \times 10^2$ | $3.23 \times 10^4$  | 91.01     |
| 3-(4-hydroxyphenyl) propan-1-one <sup>c</sup>          | -                  | -                   | -         |
| 3-(4-hydroxyphenyl) propan-2-one                       | $8.99 \times 10^1$ | $2.61 \times 10^3$  | 99.33     |
| 3-(4-hydroxyphenyl)propanoic acid                      | $6.65 \times 10^4$ | $-1.44 \times 10^5$ | 99.04     |
| 4-propylguaicol                                        | $9.42 \times 10^3$ | $3.51 \times 10^5$  | 76.70     |
| 4-hydroxy-3-methylbenzoic acid                         | $6.75 \times 10^4$ | $7.44 \times 10^4$  | 98.26     |
| 4-(3-hydroxypropyl)-2-methoxyphenol <sup>a</sup>       | $6.08 \times 10^3$ | $1.11 \times 10^5$  | 97.26     |
| 3-(4-hydroxy-3-methoxyphenyl)propanal <sup>b</sup>     | $5.45 \times 10^2$ | $7.53 \times 10^3$  | 85.05     |
| 1-(4-hydroxy-3-methoxyphenyl)propan-1-one              | $2.66 \times 10^2$ | $1.13 \times 10^4$  | 97.33     |
| 1-(4-hydroxy-3-methoxyphenyl)propan-2-one              | $1.46 \times 10^1$ | $1.58 \times 10^3$  | 98.68     |
| 3-(4-hydroxy-3-methoxyphenyl)propanoic acid            | $6.75 \times 10^4$ | $-2.70 \times 10^4$ | 97.68     |
| 4-propylsyringol                                       | $5.78 \times 10^3$ | $3.51 \times 10^4$  | 99.73     |
| 4-hydroxy-3,5-dimethoxybenzoic acid                    | $3.00 \times 10^4$ | $1.61 \times 10^5$  | 99.90     |
| 4-(3-hydroxypropyl)-2,6-dimethoxyphenol <sup>a</sup>   | $8.93 \times 10^2$ | $7.24 \times 10^4$  | 96.44     |
| 3-(4-hydroxy-3,5-dimethoxyphenyl)propanal <sup>b</sup> | $2.02 \times 10^3$ | $1.83 \times 10^4$  | 99.03     |
| 1-(4-hydroxy-3,5-methoxyphenyl)propan-1-one            | $2.06 \times 10^2$ | $1.69 \times 10^3$  | 99.92     |
| 1-(4-hydroxy-3,5-methoxyphenyl)propan-2-one            | $1.69 \times 10^1$ | $1.06 \times 10^3$  | 99.15     |
| 3-(4-hydroxy-3,5-dimethoxyphenyl)propanoic acid        | $1.10 \times 10^5$ | $1.41 \times 10^5$  | 99.99     |

61 <sup>a</sup> Monolignols comprising a hydroxyl functional group were quantified at a lower flow rate (0.1 mL/min) compared to the other monolignols  
62 (0.3 mL/min) to ensure accurate concentration estimates.

63 <sup>b</sup> We utilized the water adduct of the aldehyde monolignols to achieve accurate quantification. Additionally, this approach facilitated the  
64 quantification of potential mixtures of ketones and aldehydes resulting from monolignol biotransformation.

65 <sup>c</sup> Establishing a calibration curve for 3-(4-hydroxyphenyl)propan-1-one proved challenging, as we were unable to obtain reliable signals.

66 4. Supplementary Figures

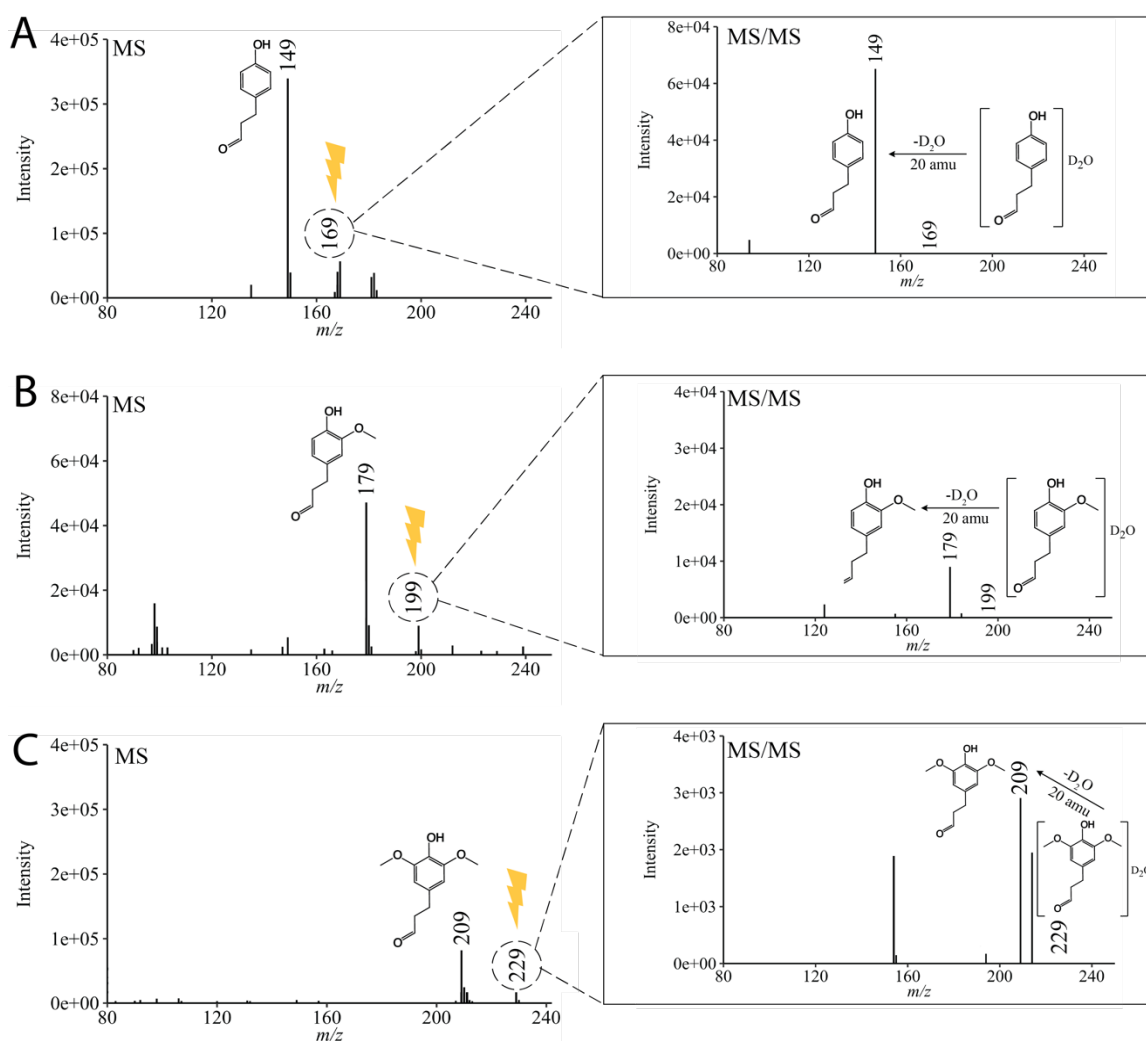

**Fig. S1: Isotope labeling experiments.** 50  $\mu\text{g/mL}$  monolignol aldehyde was dissolved in 50% ACN and 50%  $D_2O$  with 150 mM  $NH_4OH$ , assuming the formation of the heavy water adduct. Colliding the ions of the molecular species with He gas generated a mass loss of 20 amu, most likely corresponding to the loss of  $D_2O$ . Ions generating a signal 2% or less relative to the base peak are omitted for clarity. **(A)** 3-(4-hydroxyphenyl)propanal. NL:  $3.69 \times 10^5$  (MS) and  $5.23 \times 10^4$  (MS/MS). **(B)** 3-(4-hydroxy-3-methoxyphenyl)propanal. NL:  $5.00 \times 10^4$  (MS) and  $5.05 \times 10^3$  (MS/MS). **(C)** 3-(4-hydroxy-3,5-dimethoxyphenyl)propanal. NL:  $6.72 \times 10^4$  (MS) and  $1.96 \times 10^3$  (MS/MS).

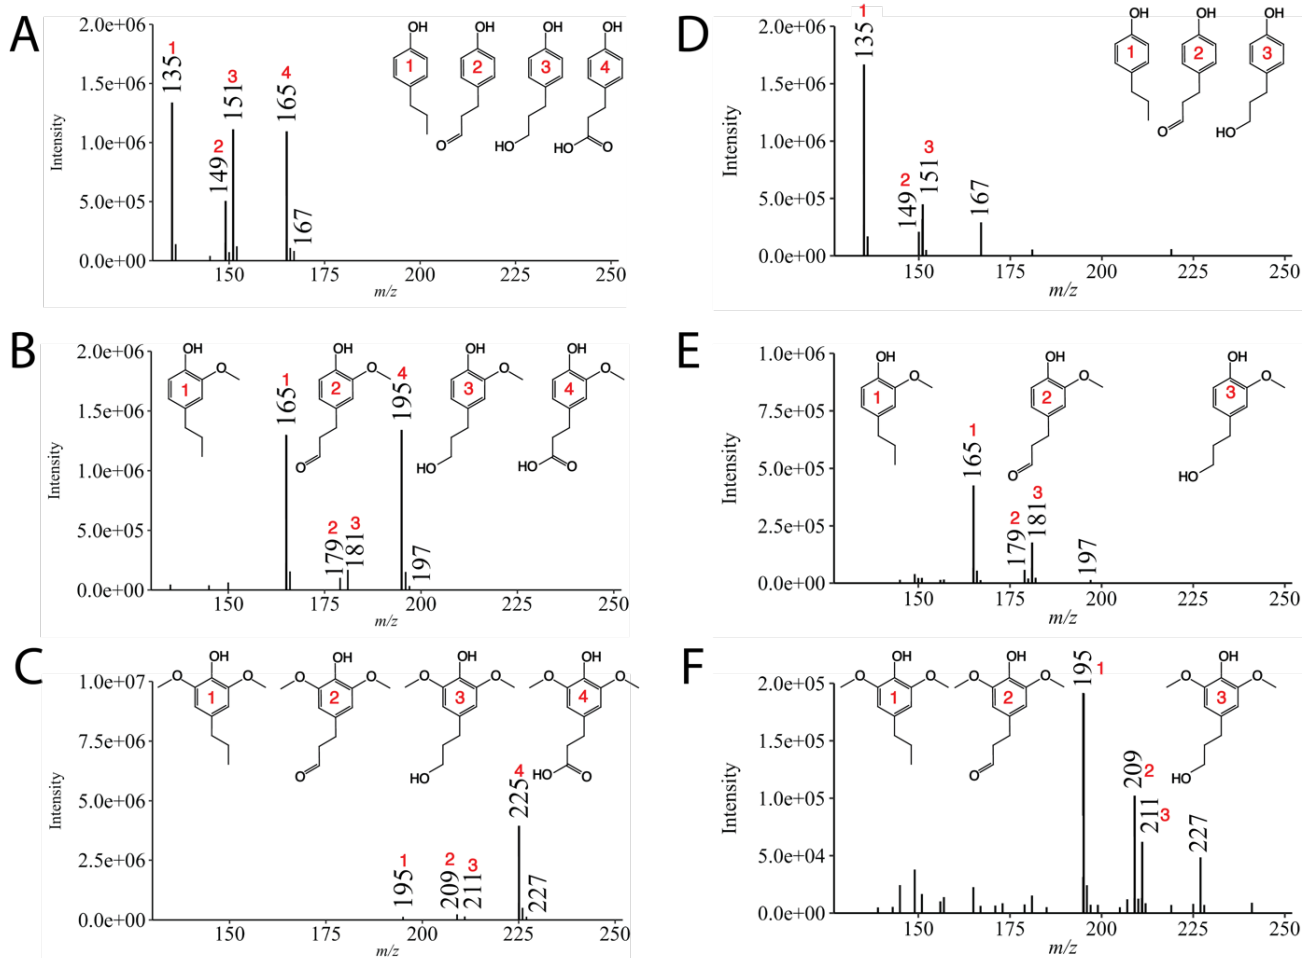

**Fig. S2: Ion suppression.** Standard solution mixtures comprising the monolignols and the corresponding C<sub>7</sub> oxidized products. The exclusion of carboxylic acid compounds from the mixtures resulted in changes to the ion intensities of other compounds, indicating ion suppression likely caused by carboxylic acid monolignols. Ions contributing a signal representing 2% or less relative to the base peak are omitted to enhance clarity. **(A)** 4PP and its C<sub>7</sub> oxidized monolignols. NL:  $1.33 \times 10^6$ . **(B)** 4PG and its C<sub>7</sub> oxidized monolignols. NL:  $1.34 \times 10^6$ . **(C)** 4PS and its C<sub>7</sub> oxidized monolignols. NL:  $3.92 \times 10^6$ . **(D)** 4PP and its C<sub>7</sub> oxidized monolignols excluding 3-(4-hydroxyphenyl)propanoic acid. NL:  $2.15 \times 10^6$ . **(E)** 4PG and its C<sub>7</sub> oxidized monolignols excluding 3-(4-hydroxy-3-methoxyphenyl)propanoic acid. NL:  $4.24 \times 10^5$ . **(F)** 4PS and its C<sub>7</sub> oxidized monolignols excluding 3-(4-hydroxy-3,5-dimethoxyphenyl)propanoic acid. NL:  $1.91 \times 10^5$ .

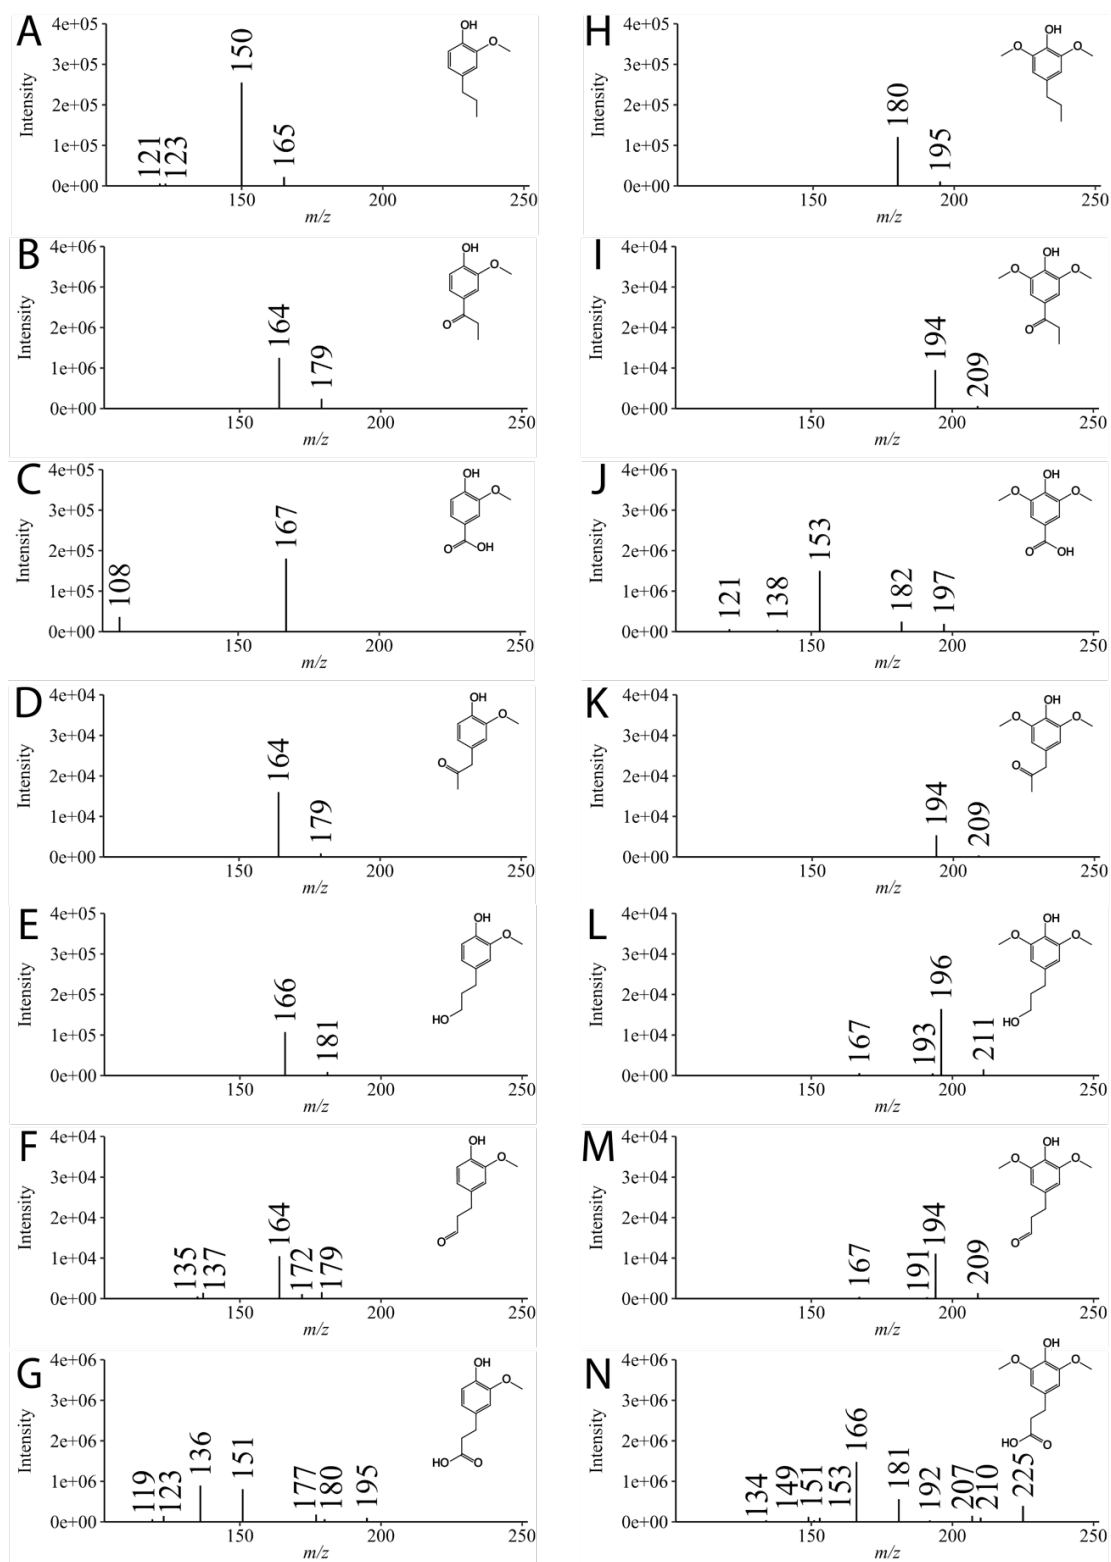

**Fig. S3: MS/MS analysis of 4-propylguaiaicol and 4-propylsyringol with respective oxifunctionalized products.** For clarity, ions producing a signal at 2% or lower relative to the base peak are intentionally excluded. **(A)** 4-propylguaiaicol (NL =  $2.53 \times 10^5$ ). **(B)** 1-(4-hydroxy-3-methoxyphenyl)propane-1-one (NL =  $1.23 \times 10^6$ ). **(C)** 4-hydroxy-3-dimethoxybenzoic acid (NL =  $1.70 \times 10^6$ ). **(D)** 1-(4-hydroxy-3-methoxyphenyl)propane-2-one (NL =  $1.58 \times 10^4$ ). **(E)** 4-(3-hydroxypropyl)-2-methoxyphenol (NL =  $1.05 \times 10^5$ ). **(F)** 3-(4-hydroxy-3-methoxyphenyl)propanal (NL =  $1.03 \times 10^4$ ). **(G)** 3-(4-hydroxy-3-methoxyphenyl)propanoic acid (NL =  $8.77 \times 10^5$ ). **(H)** 4-propylsyringol (NL =  $1.19 \times 10^5$ ). **(I)** 1-(4-hydroxy-3,5-dimethoxyphenyl)propane-1-one (NL =  $9.32 \times 10^3$ ). **(J)** 4-hydroxy-3,5-dimethoxybenzoic acid (NL =  $1.48 \times 10^6$ ). **(K)** 1-(4-hydroxy-3,5-dimethoxyphenyl)propane-2-one (NL =  $5.17 \times 10^3$ ). **(L)** 4-(3-hydroxypropyl)-2,6-dimethoxyphenol (NL =  $1.62 \times 10^4$ ). **(M)** 3-(4-hydroxy-3,5-dimethoxyphenyl)propanal (NL =  $1.10 \times 10^4$ ). **(N)** 3-(4-hydroxy-3,5-dimethoxyphenyl)propanoic acid (NL =  $1.46 \times 10^6$ ).

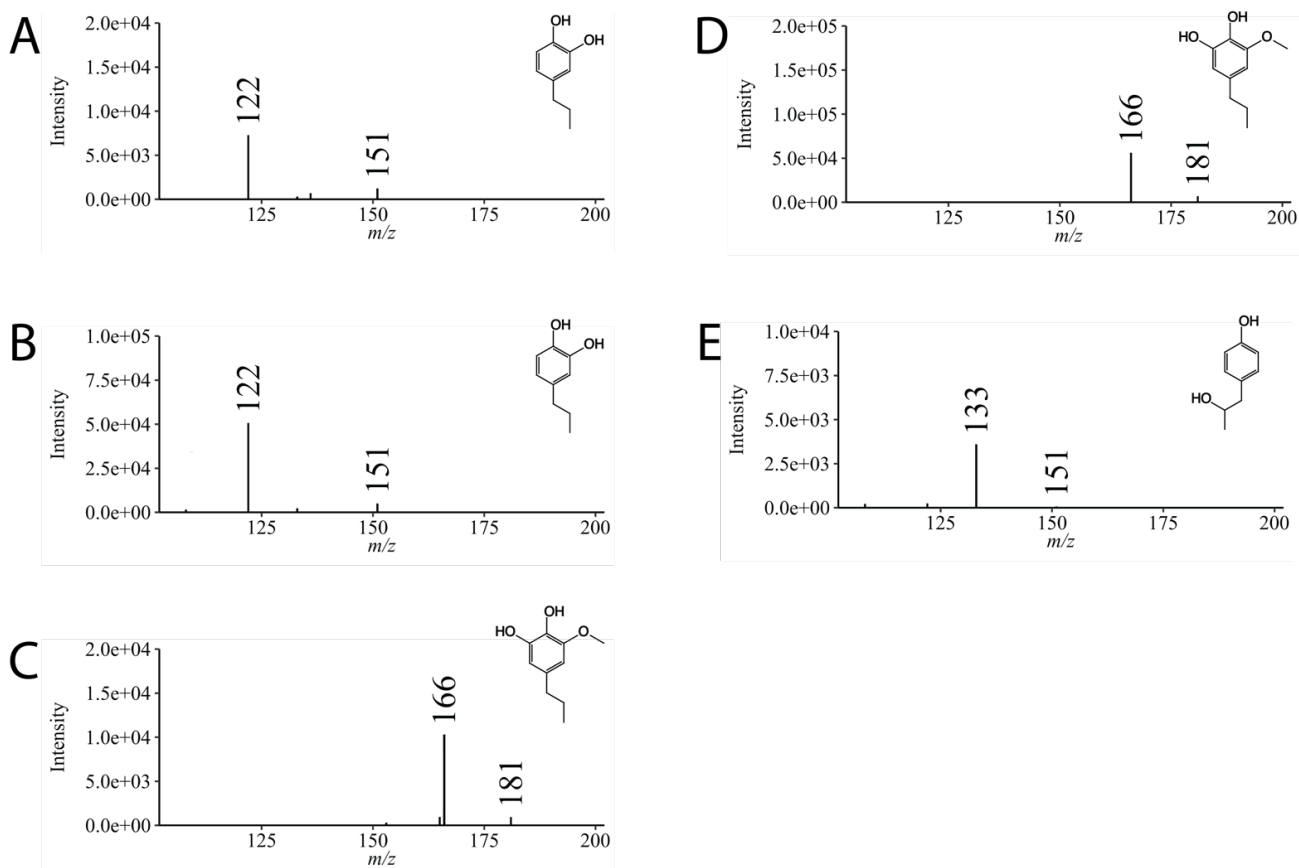

**Fig. S4: MS/MS analysis of UPO-based oxifunctionalized monolignols.** To ensure clarity, ions with a signal constituting 2% or less relative to the base peak are intentionally excluded. **(A)** 4-propylbenzene-1,2-diol produced from 4PP catalyzed by *HspUPO* (NL =  $5.02 \times 10^4$ ). **(B)** *HspUPO* catalyzed the oxifunctionalization of 4PG producing 4-propylbenzene-1,2-diol (NL =  $7.19 \times 10^3$ ). **(C)** Proposed production of 3-methoxy-5-propylbenzene-1,2-diol in the *HspUPO* catalyzed oxifunctionalization of 4PG (NL =  $5.52 \times 10^4$ ). This assumption is grounded in logical reasoning; we lack standards to validate or confirm it. **(D)** *HspUPO* catalyzed the demethylation of 4PS, proposedly producing 3-methoxy-5-propylbenzene-1,2-diol (NL =  $1.02 \times 10^4$ ). We do not have standards to validate or confirm this assumption, which is grounded in logical reasoning. **(E)** 4-(2-hydroxypropyl)phenol was produced as a result of *CmaUPO-I* catalyzed biotransformation of 4PP (NL =  $3.56 \times 10^3$ ).

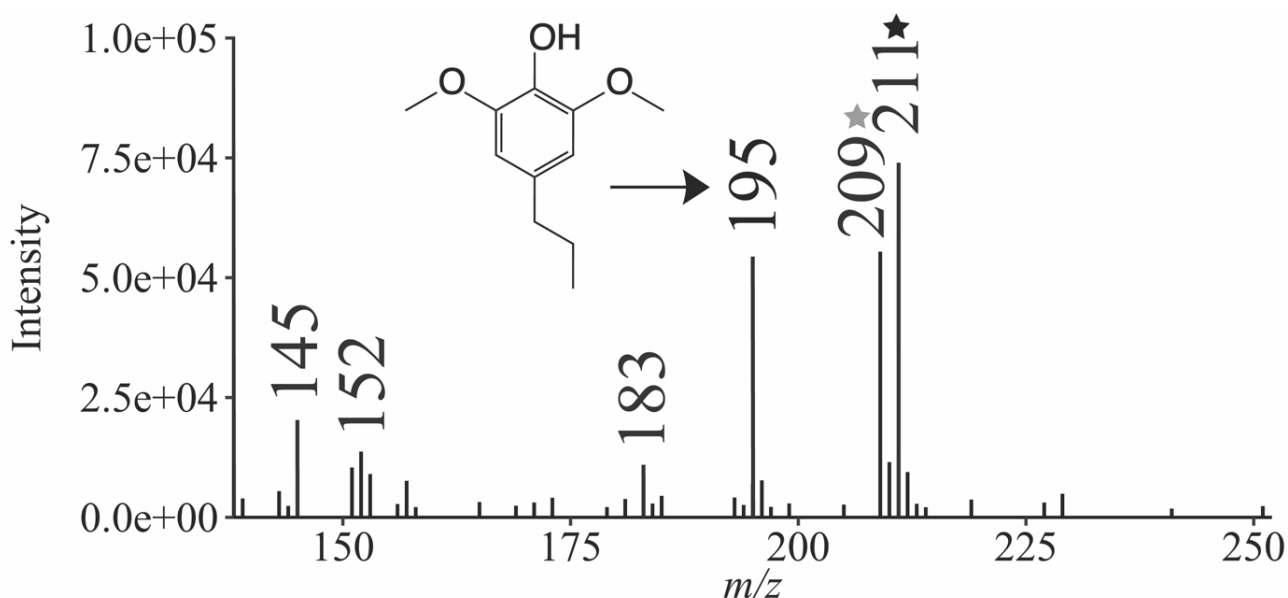

**Fig. S5: Full scan DI-ESI-MS of *CmaUPO-I* catalyzed biotransformation of 4PS at 37°C.** Pseudo-molecular ions were detected in the  $m/z$  70-2000 range. Only  $[M-H]^-$  ions that generated a signal above 2% relative to the base peak are presented for clarity. *CmaUPO-I* facilitated the hydroxylation of 4PS ( $m/z$  195) at 37°C, resulting in a potential isomeric mixture of 4PS with a hydroxyl group (annotated by a black star,  $m/z$  211). Moreover, hydroxylated compounds were further biotransformed into the respective ketones and aldehyde (annotated by a grey star,  $m/z$  209). Quantification was challenging due to the isomeric mixtures, however, the intensities of  $m/z$  211 and  $m/z$  209 were notably increased compared to the controls. NL:  $1.30 \times 10^5$ .



## 71 5. Supplementary References

- 72 1. L. Zou, B. M. Ross, L. J. Hutchison, L. P. Christopher, R. F. Dekker and L. Malek, *Enzyme Microb Technol*,  
73 2015, **73-74**, 44-50.
- 74 2. M. Poraj-Kobielska, M. Kinne, R. Ullrich, K. Scheibner and M. Hofrichter, *Analytical Biochemistry*, 2012, **421**,  
75 327-329.
- 76 3. P. Molina-Espeja, E. Garcia-Ruiz, D. Gonzalez-Perez, R. Ullrich, M. Hofrichter and M. Alcalde, *Appl Environ*  
77 *Microbiol*, 2014, **80**, 3496-3507.
- 78 4. M. Dolz, D. T. Monterrey, A. Beltrán-Nogal, A. Menés-Rubio, M. Keser, D. González-Pérez, P. G. de Santos,  
79 J. Viña-González and M. Alcalde, in *Methods in Enzymology*, ed. H. Renata, Academic Press, 2023, vol. 693, pp. 73-  
80 109.
- 81 5. M. Kinne, M. Poraj-Kobielska, S. A. Ralph, R. Ullrich, M. Hofrichter and K. E. Hammel, *J Biol Chem*, 2009,  
82 **284**, 29343-29349.
- 83 6. L. Rotilio, A. Swoboda, K. Ebner, C. Rinnofner, A. Glieder, W. Kroutil and A. Mattevi, *Acs Catal*, 2021, **11**,  
84 11511-11525.
- 85 7. A. Swoboda, L. J. Pfeifenberger, Z. Duhović, M. Bürgler, I. Oroz-Guinea, K. Bangert, F. Weißensteiner, L.  
86 Parigger, K. Ebner, A. Glieder and W. Kroutil, *Angewandte Chemie International Edition*, 2023, **62**, e202312721.  
87
